# Supplementary material for: Self-assembled serum albumin–poly(l-lactic acid) nanoparticles: a novel nanoparticle platform for drug delivery in cancer
Source: Royal Society of Chemistry journal article supplement (doi:10.1039/c4ra16346j), 2015-01-01
Supplement: c4ra16346j1.pdf [file c4ra16346j1.pdf]

## ***Supporting Information***

### **Self-assembled serum albumin-poly(L-lactic acid) nanoparticles: novel nanoparticle platform for drug delivery in cancer**

*Lin Dai,<sup>a</sup> Chun-Xiao Li,<sup>a</sup> Ke-Feng Liu,<sup>a</sup> Hai-Jia Su,<sup>b</sup> Bi-Qiang Chen,<sup>b</sup> Gui-Feng Zhang,<sup>c</sup> Jing He,<sup>\*a</sup> and Jian-Du Lei,<sup>\*a</sup>*

<sup>a</sup> Beijing Key Laboratory of Lignocellulosic Chemistry, Beijing Forestry University, Beijing 100083, P. R. China, <sup>b</sup> Beijing Key Laboratory of Bioprocess, Beijing University of Chemical Technology, Beijing 100029, P. R. China, and <sup>c</sup> Institute of Process Engineering, Chinese Academy of Sciences, Beijing 100090, P. R. China

E-mail addresses: hejing2008@sina.com (J. H.). E-mail: ljd2012@bjfu.edu.cn (J.D. L.).

<sup>1</sup>H-NMR spectrum was used to identify ratio of BSA to PLLA in conjugates. As shown in Figure S1, the signals from 6.0 ~ 9.0 ppm attribute to 1262 protons from the BSA molecule,<sup>1</sup> while the signals from 0.9 ~ 1.6 ppm belongs to 3 protons from methyl group of each repeating unit in PLLA.<sup>2</sup> By integration of the peaks from 6.0 ~ 9.0 ppm, the molar ratio of repeating unit in PLLA to BSA molecule was calculated to be 307:1, 1174:1, and 2368:1, respectively. Knowing that repeating unit in PLLA and BSA has a molecular weight of 76 Da and 66 kDa, respectively. And, the mass percentage of PLLA in the conjugate was calculated to be 25 wt%, 56 wt%, and 72 wt%.

1. Ge, J.; Neofytou, E.; Lei, J.; Beygui, R. E.; Zare, R. N. Protein-polymer hybrid nanoparticles for drug delivery. *Small* 2012, 8, 3573-8.
2. Nomura, N.; Ishii, R.; Akakura, M.; Aoi, K. Stereoselective Ring-Opening Polymerization of Racemic Lactide Using Aluminum-Achiral Ligand Complexes: Exploration of a Chain-End Control Mechanism. *Journal of the American Chemical Society* 2002, 124, 5938-5939.

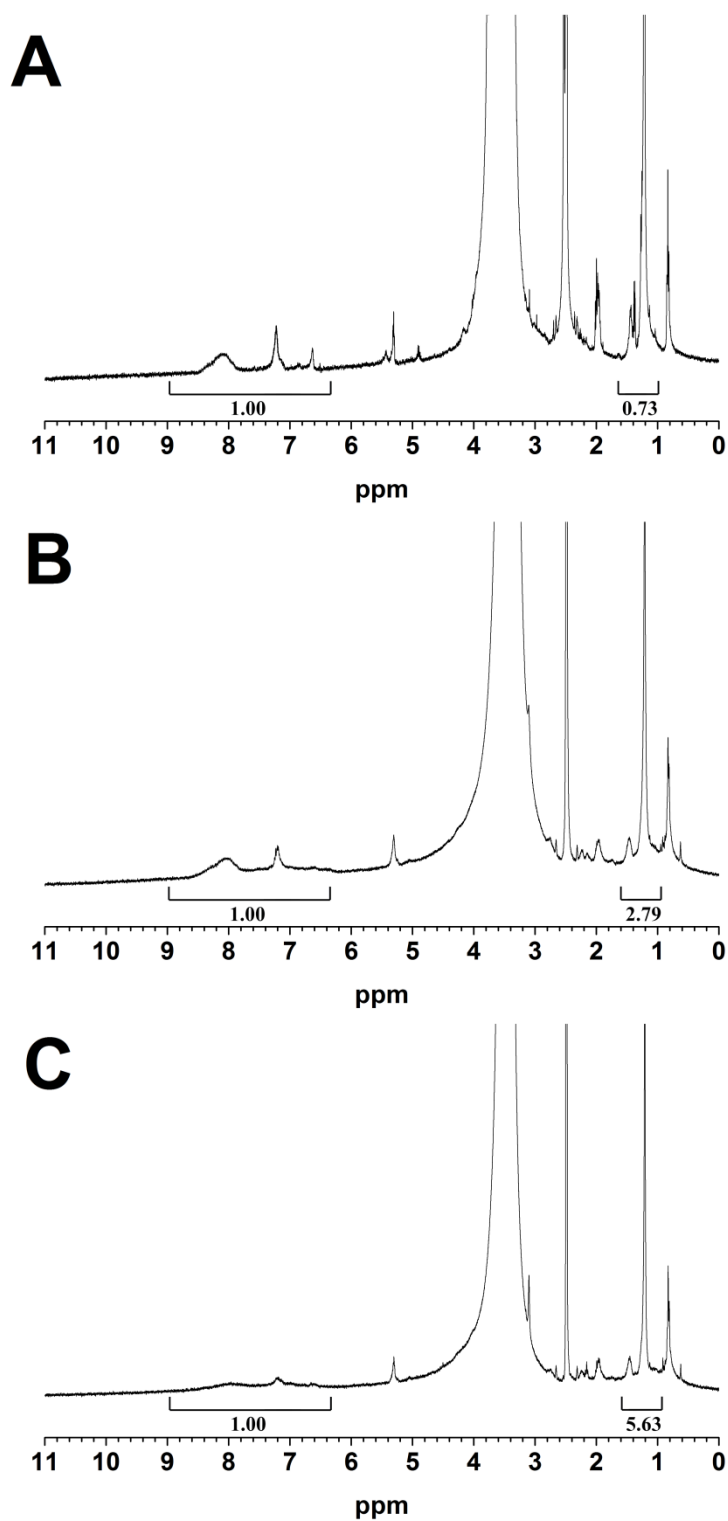

**Figure S1.**  $^1\text{H}$ -NMR of BSA-PLLA with different PLLA content. (A) 25 wt%; (B) 56 wt%; (C) 72 wt%.
